# Supplementary material for: Short-Term Temporal Metabolic Behavior in Halophilic Cyanobacterium Synechococcus sp. Strain PCC 7002 after Salt Shock
Source: MDPI journal article supplement (doi:10.3390/metabo9120297), 2019-12-05
Supplement: s1 [file s1]

Table S1: Gene expression of the photosynthesis reaction center, phycobilisome, cytochrome *b6f*, and electron carrier proteins with more than 2-fold changes at either 0.5 M or 1 M NaCl, except for the genes shown in Table 5.

| Gene        | Accession No. | Function                                           | Induction factor   |                    |
|-------------|---------------|----------------------------------------------------|--------------------|--------------------|
|             |               |                                                    | 0.5 M NaCl         | 1 M NaCl           |
| <i>psaC</i> | A1589         | PSI iron-sulfur center subunit VII                 | -2.3 ( $\pm 0.4$ ) | -1.1 ( $\pm 0.0$ ) |
| <i>psaD</i> | A0682         | PSI subunit II                                     | -2.6 ( $\pm 0.3$ ) | -1.7 ( $\pm 0.4$ ) |
| <i>psaE</i> | A1393         | PSI reaction center subunit IV                     | -3.1 ( $\pm 0.7$ ) | -4.5 ( $\pm 0.3$ ) |
| <i>psaF</i> | A1008         | PSI reaction center subunit III                    | -3.4 ( $\pm 0.5$ ) | -4.6 ( $\pm 2.6$ ) |
| <i>psaK</i> | A2401         | PSI reaction center subunit X                      | -3.0 ( $\pm 0.2$ ) | -2.3 ( $\pm 0.2$ ) |
| <i>psaL</i> | A2620         | PSI reaction center subunit XI                     | -2.3 ( $\pm 0.1$ ) | -1.9 ( $\pm 0.1$ ) |
| <i>ycf3</i> | A1566         | PSI assembly protein                               | -2.6 ( $\pm 0.7$ ) | -4.4 ( $\pm 0.5$ ) |
| <i>ycf4</i> | A0229         | PSI assembly protein                               | -2.3 ( $\pm 0.3$ ) | -2.2 ( $\pm 0.1$ ) |
| <i>psbB</i> | A1759         | PSII 47 kDa protein                                | -3.3 ( $\pm 0.3$ ) | -1.9 ( $\pm 0.3$ ) |
| <i>psbC</i> | A1559         | PSII 44 kDa protein                                | -2.4 ( $\pm 0.3$ ) | -2.3 ( $\pm 0.1$ ) |
| <i>psbD</i> | A1560         | PSII subunit D2                                    | -1.9 ( $\pm 0.1$ ) | -2.1 ( $\pm 0.1$ ) |
| <i>psbH</i> | A0808         | PSII subunit H                                     | -3.1 ( $\pm 0.1$ ) | -3.1 ( $\pm 0.3$ ) |
| <i>psbO</i> | A0269         | PSII manganese-stabilizing protein                 | -3.8 ( $\pm 0.2$ ) | -3.4 ( $\pm 0.5$ ) |
| <i>psbU</i> | A0322         | PSII 12 kDa protein                                | -4.7 ( $\pm 0.5$ ) | -2.7 ( $\pm 0.4$ ) |
| <i>psbW</i> | A1258         | PSII 13 kDa protein                                | -1.2 ( $\pm 0.1$ ) | -2.4 ( $\pm 0.2$ ) |
| <i>psbZ</i> | A2533         | PSII subunit Z                                     | -2.4 ( $\pm 0.5$ ) | -4.4 ( $\pm 0.8$ ) |
| <i>apcC</i> | A1928         | APC-associated PBS 7.8 kDa core-linker polypeptide | -4.2 ( $\pm 0.0$ ) | -3.5 ( $\pm 0.2$ ) |
| <i>apcF</i> | A1631         | APC subunit beta-18                                | -3.6 ( $\pm 0.3$ ) | -1.9 ( $\pm 0.3$ ) |
| <i>cpcC</i> | A2211         | PC-associated rod linker protein                   | -4.6 ( $\pm 0.4$ ) | -1.6 ( $\pm 0.5$ ) |
| <i>cpcD</i> | A2212         | PC-associated rod terminated linker protein        | -3.9 ( $\pm 0.8$ ) | -1.1 ( $\pm 0.1$ ) |
| <i>cpcG</i> | A0639         | PBS rod-core linker polypeptide                    | -4.3 ( $\pm 0.5$ ) | -2.5 ( $\pm 0.5$ ) |
| <i>petD</i> | A0841         | Cytochrome <i>b6/f</i> subunit IV                  | -2.2 ( $\pm 0.2$ ) | -4.4 ( $\pm 0.7$ ) |

|             |       |                                                       |               |               |
|-------------|-------|-------------------------------------------------------|---------------|---------------|
| <i>petC</i> | A1909 | Cytochrome <i>b<sub>6</sub>/f</i> iron-sulfur subunit | − 3.6 (± 0.6) | − 7.3 (± 1.6) |
| <i>petF</i> | A2192 | Ferredoxin 2Fe-2S                                     | − 1.4 (± 0.2) | − 2.8 (± 0.3) |
| <i>petF</i> | A2326 | Ferredoxin I (2Fe-2S)                                 | − 1.8 (± 0.3) | − 2.9 (± 0.4) |
| <i>petH</i> | A0853 | Ferredoxin-NADP reductase                             | − 2.9 (± 0.5) | − 4.5 (± 0.4) |
| <i>petJ</i> | A0167 | Cytochrome <i>c<sub>6</sub></i>                       | − 2.3 (± 0.2) | − 2.2 (± 0.1) |
| <i>atpC</i> | A0750 | ATP synthase F1, epsilon subunit                      | − 3.7 (± 0.2) | − 4.5 (± 0.5) |
| <i>atpD</i> | A0749 | ATP synthase beta chain                               | − 2.5 (± 0.3) | − 2.9 (± 0.7) |
| <i>atpE</i> | A0738 | ATP synthase C chain                                  | − 4.0 (± 0.1) | − 5.9 (± 0.5) |
| <i>atpF</i> | A0736 | ATP synthase B chain                                  | − 4.2 (± 0.5) | − 4.8 (± 0.6) |
| <i>atpG</i> | A0737 | ATP synthase B chain                                  | − 3.6 (± 0.3) | − 4.8 (± 0.4) |
| <i>atpG</i> | A0733 | ATP synthase F1, gamma subunit                        | − 3.6 (± 0.6) | − 3.9 (± 0.3) |
| <i>atpH</i> | A0735 | ATP synthase F1, delta subunit                        | − 4.3 (± 0.4) | − 3.9 (± 0.2) |

---

Each value indicates the ratio of the level expression in stressed cells to that in control cells. Values shown are means (±SD) of results of three independent experiments.
